# Supplementary material for: Site count: is a high-pressure quenched-flow reactor suitable for kinetic studies of molecular catalysts in ethylene polymerization?
Source: Royal Society of Chemistry journal article supplement (doi:10.1039/c3dt33004d), 2013-01-01
Supplement: c3dt33004d.pdf [file c3dt33004d.pdf]

## Supporting Information

Site count: is a high-pressure quenched-flow reactor suitable for kinetic studies of molecular catalysts in ethylene polymerization?

Maria Maddalena Ranieri, Jean-Pierre Broyer, , Francesco Cutillo, Timothy F.L. McKenna, Christophe Boisson

## Temperatures profiles

One important question concerns the evolution of the temperature in the reactor. The equation below was used to prove that the adiabatic temperature rise is lower than 1°C ( $\Delta T = 0.1-0.5^\circ\text{C}$ ), even in case of monomer consumption higher than 10%.

$$\Delta T = (Q \cdot M_w) / (C_p \cdot \rho \cdot V) \quad (2)$$

Where

$C_p$  is given by eq.  $C_p = C_1 + C_2 T + C_3 T^2$  with  $C_1 = 140140$   $C_2 = -152.3$   $C_3 = 0.695$  for toluene

$\rho$  is the toluene density =  $0.87 \text{ g}\cdot\text{ml}^{-1}$ ;

$V$  is the volume which was passed through the Teflon tube;

$M_w$  is the molar mass of toluene =  $92.14 \text{ g}\cdot\text{mol}^{-1}$ ;

The released heat,  $Q$ , is given by the product between  $\Delta H$  of polymerization and the mol of monomer consumed. The value of  $\Delta H$  of polymerization is  $25 \text{ kcal}\cdot\text{mol}^{-1}$ .

A series of tests were carried out where we measured the temperature in tubular reactor in order to evaluate the difference temperature between inlet and outlet of the reaction tube. The  $\Delta T$  during the ethylene polymerization with the catalyst system **I/MAO** was measured using two **K** thermocouples. The first thermocouple was positioned in point **3** (see Fig. 1 in the paper), replacing the T-mixer with a cross-mixer; the second one was placed in point **5** at the end of tubular reactor. The temperature profiles in Fig. S1 are relative to runs 4 and 5 carried out using tubular reactor of 2 m and run 1 carried out using tubular reactor of 0.5 m which corresponds to residence times of 0.51, 0.7 and 0.09 s respectively, and ethylene consumption up to 6%.

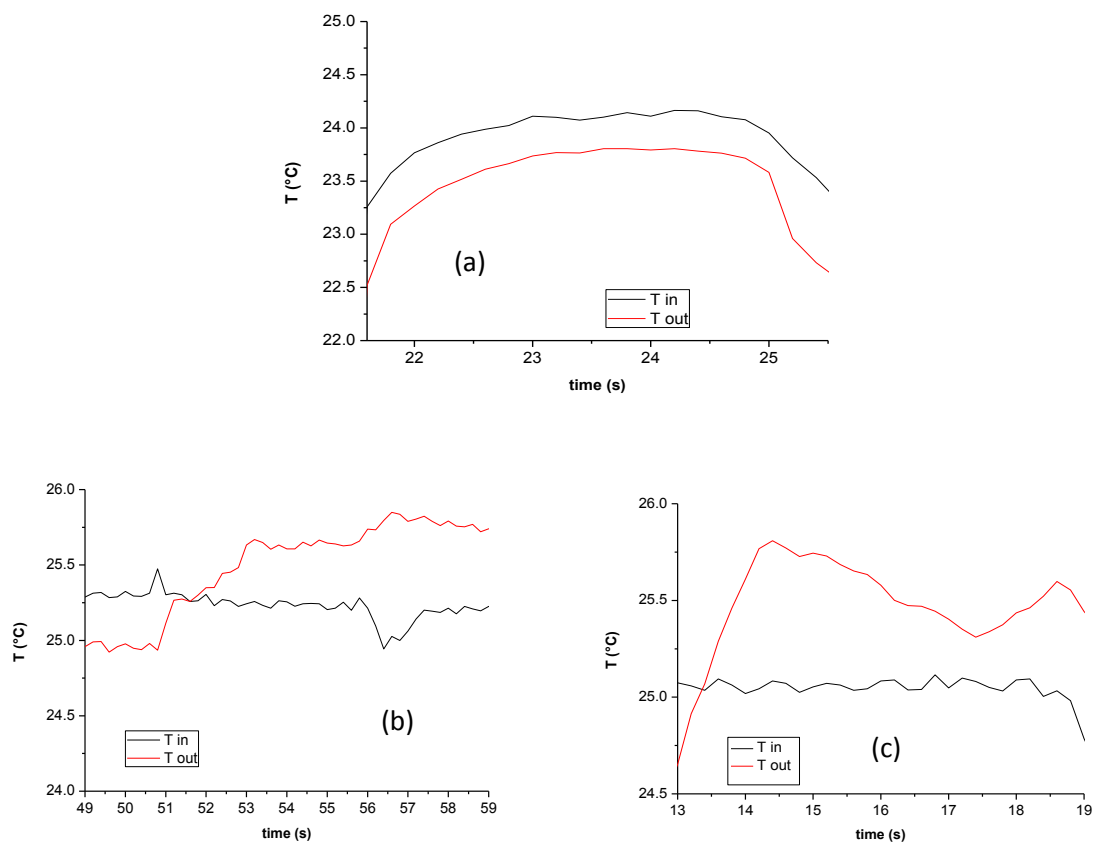

**Fig. S1.** Temperature profiles of (a) run 1, (b) run 4, (c) run 5

For tests at short reaction times, the  $\Delta T$  measured was lower than  $0.5^{\circ}\text{C}$ , furthermore for reactions carried out at long reaction time we observed a maximum of  $1^{\circ}\text{C}$ , which means that even for long reaction time the heat release during the polymerization is negligible.

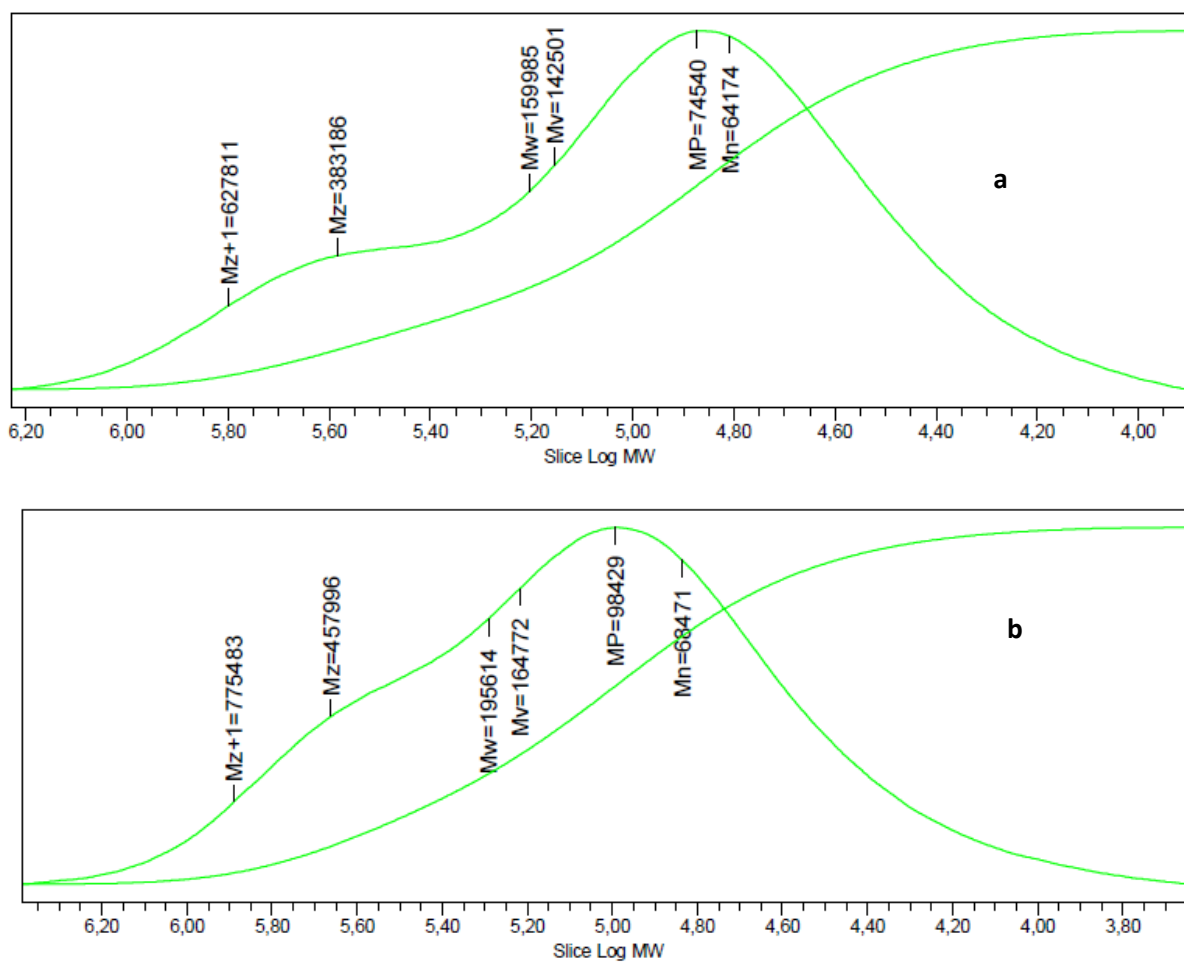

**Fig. S2.** SEC profiles of polymers obtained with catalyst **II**/MAO/*t*Bu<sub>2</sub>-PhOH (runs 7 (a) and 8 (b))
